# Supplementary material for: Origin of Emotion Effects on ERP Correlates of Emotional Word Processing: The Emotion Duality Approach
Source: PLoS One. 2015 May 8;10(5):e0126129. doi: 10.1371/journal.pone.0126129 (PMC4425658; doi:10.1371/journal.pone.0126129)
Supplement: S1 File — (DOCX) [file pone.0126129.s001.docx]

Table A. Pairwise *t*-test contrasts of amplitude in ROIs for the time interval 200-300 ms and different levels of valence. *P*-table shows the uncorrected *p*-values, the Bonferroni corrected significance level is *alpha*=0.003. Significant differences marked in boldface.

|  | M (SEM) | | | contrast | |
| --- | --- | --- | --- | --- | --- |
| ROI | Neg | Neu | Pos | t(49) | P-table |
| Pre-Frontal | 4.2 (0.9) | 3.3 (0.7) | 2.6 (1) | |  | Neg | Neu | | --- | --- | --- | | Neu | -1.44 |  | | Pos | 3.28 | 1.13 | | |  | Neg | Neu | | --- | --- | --- | | Neu | 0.15 |  | | Pos | 0.002 | 0.2 | |
| Frontal | 5.6 (0.6) | 4.9 (0.6) | 4.6 (0.7) | |  | Neg | Neu | | --- | --- | --- | | Neu | 1.35 |  | | Pos | 2.81 | 0.63 | | |  | Neg | Neu | | --- | --- | --- | | Neu | 0.18 |  | | Pos | 0.007 | 0.5 | |
| Central | 5.5 (0.5) | 5.1 (0.4) | 5.4 (0.5) | |  | Neg | Neu | | --- | --- | --- | | Neu | 1.15 |  | | Pos | 0.64 | -0.62 | | |  | Neg | Neu | | --- | --- | --- | | Neu | 0.3 |  | | Pos | 0.5 | 0.5 | |
| Posterior | 4.4 (0.4) | 4.5 (0.4) | 5.1 (0.4) | |  | Neg | Neu | | --- | --- | --- | | Neu | -0.47 |  | | Pos | -2.49 | -1.88 | | |  | Neg | Neu | | --- | --- | --- | | Neu | 0.6 |  | | Pos | 0.02 | 0.07 | |
| Occipital | 2.7 (0.5) | 3.2 (0.5) | 3.7 (0.4) | |  | Neg | Neu | | --- | --- | --- | | Neu | -2.21 |  | | Pos | -4.10 | -1.65 | | |  | Neg | Neu | | --- | --- | --- | | Neu | 0.03 |  | | Pos | 0.0001 | 0.1 | |

Table B. Pairwise *t*-test contrasts of amplitude in ROIs for the time interval 300-390 ms and different levels of origin. *P*-table shows the uncorrected *p*-values, the Bonferroni corrected significance level is *alpha*=0.01. Significant differences marked in boldface.

|  | M (SEM) | | contrast | |
| --- | --- | --- | --- | --- |
| ROI | Aut | Ref | t(74) | P-table |
| Pre-Frontal | 4.2 (0.9) | 3.3 (0.7) | -0.74 | 0.5 |
| Frontal | 5.6 (0.6) | 4.9 (0.6) | -2.73 | 0.008 |
| Central | 5.5 (0.5) | 5.1 (0.4) | -3.67 | 0.0004 |
| Posterior | 4.4 (0.4) | 4.5 (0.4) | -4.19 | 7e-5 |
| Occipital | 2.7 (0.5) | 3.2 (0.5) | -3.75 | 0.0003 |

Table C. Pairwise *t*-test contrasts of amplitude in ROIs for the time interval 390-590 ms and different levels of origin. *P*-table shows the uncorrected *p*-values, the Bonferroni corrected significance level is *alpha*=0.01. Significant differences marked in boldface.

|  | M (SEM) | | contrast | |
| --- | --- | --- | --- | --- |
| ROI | Aut | Ref | t(74) | P-table |
| Pre-Frontal | -5.2 (0.9) | -4.6 (0.9) | -1.31 | 0.2 |
| Frontal | -0.4 (0.6) | 0.7 (0.6) | -3.30 | 0.001 |
| Central | 3.7 (0.6) | 5.0 (0.6) | -4.70 | 1e-5 |
| Posterior | 7.9 (0.6) | 9.1 (0.6) | -3.82 | 0.0003 |
| Occipital | 5.0 (0.5) | 5.6 (0.5) | -1.12 | 0.03 |

Table D. Pairwise *t*-test contrasts of amplitude in ROIs for the time interval 390-590 ms and different levels of valence. *P*-table shows the uncorrected *p*-values, the Bonferroni corrected significance level is *alpha*=0.003. Significant differences marked in boldface.

|  | M (SEM) | | | contrast | |
| --- | --- | --- | --- | --- | --- |
| ROI | Neg | Neu | Pos | t(49) | P-table |
| Pre-Frontal | -4 (1) | -5.5 (1) | -5 (1) | |  | Neg | Neu | | --- | --- | --- | | Neu | 2.35 |  | | Pos | 1.70 | -0.65 | | |  | Neg | Neu | | --- | --- | --- | | Neu | 0.02 |  | | Pos | 0.09 | 0.5 | |
| Frontal | 0.9 (0.7) | -0.7 (0.7) | 0.3 (0.8) | |  | Neg | Neu | | --- | --- | --- | | Neu | 3.78 |  | | Pos | 1.35 | -1.89 | | |  | Neg | Neu | | --- | --- | --- | | Neu | 0.0004 |  | | Pos | 0.2 | 0.06 | |
| Central | 4.9 (0.7) | 3.4 (0.7) | 4.6 (0.7) | |  | Neg | Neu | | --- | --- | --- | | Neu | 4.58 |  | | Pos | 0.90 | -3.26 | | |  | Neg | Neu | | --- | --- | --- | | Neu | 3e-5 |  | | Pos | 0.4 | 0.002 | |
| Posterior | 8.8 (0.8) | 7.8 (0.8) | 8.8 (0.8) | |  | Neg | Neu | | --- | --- | --- | | Neu | 2.92 |  | | Pos | 0.04 | -2.73 | | |  | Neg | Neu | | --- | --- | --- | | Neu | 0.005 |  | | Pos | 0.96 | 0.009 | |
| Occipital | 5.4 (0.6) | 4.9 (0.6) | 5.5 (0.5) | |  | Neg | Neu | | --- | --- | --- | | Neu | 1.56 |  | | Pos | -0.33 | -1.76 | | |  | Neg | Neu | | --- | --- | --- | | Neu | 0.1 |  | | Pos | 0.74 | 0.08 | |

Table E. Pairwise *t*-test contrasts of amplitude in ROIs for the time interval 590-750 ms and different levels of origin. *P*-table shows the uncorrected *p*-values, the Bonferroni corrected significance level is *alpha*=0.01. Significant differences marked in boldface.

|  | M (SEM) | | contrast | |
| --- | --- | --- | --- | --- |
| ROI | Aut | Ref | t(74) | P-table |
| Pre-Frontal | -5.0 (0.8) | -4.5 (0.9) | -0.96 | 0.3 |
| Frontal | -2.4 (0.6) | -1.3 (0.6) | -2.35 | 0.02 |
| Central | 2.6 (0.6) | 3.6 (0.7) | -3.13 | 0.002 |
| Posterior | 7.1 (0.6) | 7.9 (0.7) | -2.52 | 0.01 |
| Occipital | 3.8 (0.4) | 4.2 (0.5) | -1.66 | 0.1 |

Table F. Pairwise *t-*test contrasts of amplitude in ROIs for the time interval 590-750 ms and different levels of valence. *P*-table shows the uncorrected *p*-values, the Bonferroni corrected significance level is *alpha*=0.003. Significant differences marked in boldface.

|  | M (SEM) | | | contrast | |
| --- | --- | --- | --- | --- | --- |
| ROI | Neg | Neu | Pos | t(49) | P-table |
| Pre-Frontal | -4 (1) | -5 (1) | -5 (1) | |  | Neg | Neu | | --- | --- | --- | | Neu | 1.61 |  | | Pos | 1.81 | -0.17 | | |  | Neg | Neu | | --- | --- | --- | | Neu | 0.1 |  | | Pos | 0.07 | 0.9 | |
| Frontal | -1.3 (0.7) | -2.5 (0.7) | -1.7 (0.8) | |  | Neg | Neu | | --- | --- | --- | | Neu | 1.90 |  | | Pos | 0.85 | -1.37 | | |  | Neg | Neu | | --- | --- | --- | | Neu | 0.06 |  | | Pos | 0.4 | 0.2 | |
| Central | 3.8 (0.8) | 2.2 (0.8) | 3.3 (0.8) | |  | Neg | Neu | | --- | --- | --- | | Neu | 3.87 |  | | Pos | 1.10 | -3.17 | | |  | Neg | Neu | | --- | --- | --- | | Neu | 0.0003 |  | | Pos | 0.3 | 0.003 | |
| Posterior | 8 (0.9) | 6.7 (0.8) | 7.7 (0.8) | |  | Neg | Neu | | --- | --- | --- | | Neu | 3.41 |  | | Pos | 0.77 | -3.10 | | |  | Neg | Neu | | --- | --- | --- | | Neu | 0.001 |  | | Pos | 0.4 | 0.003 | |
| Occipital | 4.2 (0.6) | 3.5 (0.5) | 4.3 (0.6) | |  | Neg | Neu | | --- | --- | --- | | Neu | 1.96 |  | | Pos | -0.07 | -2.29 | | |  | Neg | Neu | | --- | --- | --- | | Neu | 0.05 |  | | Pos | 0.9 | 0.03 | |
